# Supplementary material for: A helium nanodroplet setup for mid and far-infrared spectroscopy using pulsed-free-electron lasers: vibrational spectra of propargyl alcohol
Source: Royal Society of Chemistry journal article supplement (doi:10.1039/c7ra08102b), 2017-01-01
Supplement: c7ra08102b1.pdf [file c7ra08102b1.pdf]

*Supporting Information for*

**A Helium Nanodroplet Setup for Mid and Far-Infrared Spectroscopy  
using Pulsed-Free Electron Lasers: Vibrational Spectra of Propargyl  
Alcohol.**

Devendra Mani<sup>1</sup>, Theo Fischer<sup>1</sup>, Raffael Schwan<sup>1</sup>, Arghya Dey<sup>1,2</sup>, Britta Redlich<sup>2</sup>, A.F.G. Van der Meer<sup>2</sup>, Gerhard Schwaab<sup>1</sup> and Martina Havenith<sup>1</sup>.

1. Lehrstuhl für Physikalische Chemie II, Ruhr Universität Bochum, 44801 Bochum, Germany.
2. Radboud University, Institute for Molecules and Materials, FELIX Laboratory, 6525 ED Nijmegen, The Netherlands.

Table S1. Coordinates of the optimized geometries of gauche and trans-propargyl alcohol at MP2/6-311+G(3df,2p) level.

| Atom | gauche-PA |          |          | trans-PA |          |          |
|------|-----------|----------|----------|----------|----------|----------|
|      | x (Å)     | y(Å)     | z(Å)     | x(Å)     | y(Å)     | z(Å)     |
| C    | 1.92120   | -0.21663 | -0.01240 | -1.94127 | -0.20695 | 0.00000  |
| C    | 0.76867   | 0.16507  | -0.00497 | -0.77694 | 0.13287  | 0.00007  |
| H    | 2.93150   | -0.54653 | -0.03079 | -2.95810 | -0.51574 | -0.00020 |
| C    | -0.63161  | 0.59001  | 0.03550  | 0.61353  | 0.57254  | 0.00011  |
| O    | -1.54097  | -0.49073 | -0.09835 | 1.45463  | -0.57321 | 0.00020  |
| H    | -0.83943  | 1.25870  | -0.79788 | 0.79143  | 1.19006  | 0.88521  |
| H    | -0.81288  | 1.14468  | 0.96031  | 0.79151  | 1.19006  | -0.88497 |
| H    | -1.30104  | -1.16173 | 0.54640  | 2.36620  | -0.26947 | -0.00268 |

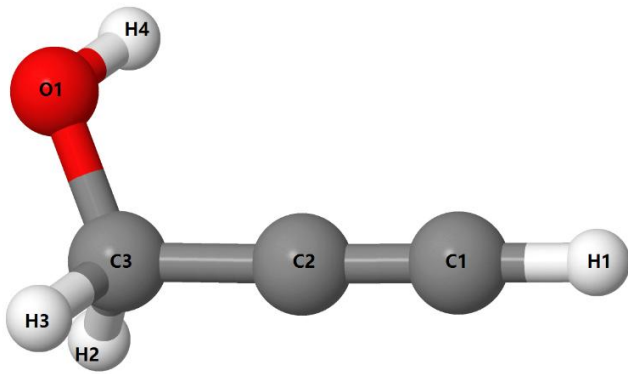

Figure S1. Optimized geometry of gauche-PA at MP2/6-311+G(3df,2p) level.

Table S2. Energies (E) in cm<sup>-1</sup> and Integrated intensities in km.mol<sup>-1</sup> for gauche and trans-PA for under harmonic and anharmonic approximations at MP2/6-311+G(3df,2p) level. An approximate description of corresponding normal modes is also given. Refer to Figure S1 for atom numberings.

| Mode (Quanta) | gauche-PA |            |         |            | Trans-PA |            |          |            | Approximate mode description                                                                                                      |
|---------------|-----------|------------|---------|------------|----------|------------|----------|------------|-----------------------------------------------------------------------------------------------------------------------------------|
|               | E (harm)  | E (anharm) | I(harm) | I (anharm) | E (harm) | E (anharm) | I (harm) | I (anharm) |                                                                                                                                   |
| 1(1)          | 3869.4    | 3682.4     | 44.3    | 38.7       | 3871.4   | 3690.5     | 42.1     | 37.3       | O-H stretch                                                                                                                       |
| 2(1)          | 3484.4    | 3356.9     | 57.0    | 51.2       | 3487.4   | 3359.9     | 55.0     | 49.4       | acetylenic C-H stretch                                                                                                            |
| 3(1)          | 3147.4    | 3009.1     | 5.2     | 5.8        | 3092.9   | 2953.3     | 14.5     | 17.3       | antisymmetric CH <sub>2</sub> stretch                                                                                             |
| 4(1)          | 3066.5    | 2905.9     | 28.3    | 29.6       | 3049.6   | 2908.3     | 34.1     | 35.3       | symmetric CH <sub>2</sub> stretch                                                                                                 |
| 5(1)          | 2133.2    | 2094.1     | 1.8     | 1.6        | 2146.3   | 2104.0     | 2.6      | 2.5        | C≡C stretch                                                                                                                       |
| 6(1)          | 1518.5    | 1477.4     | 1.9     | 1.6        | 1526.0   | 1480.3     | 1.1      | 1.1        | CH <sub>2</sub> Scissoring                                                                                                        |
| 7(1)          | 1423.0    | 1382.2     | 51.0    | 44.0       | 1454.0   | 1410.0     | 25.1     | 19.4       | CH <sub>2</sub> wagging coupled with C-OH bending                                                                                 |
| 8(1)          | 1361.8    | 1320.6     | 2.8     | 4.0        | 1276.8   | 1247.6     | 0.0      | 0.0        | O1C3H3 bending coupled with C3O1H4bending                                                                                         |
| 9(1)          | 1227.5    | 1198.9     | 17.1    | 13.9       | 1247.1   | 1236.0     | 65.2     | 58.0       | CH <sub>2</sub> twist coupled with C3O1H4 bend for gauche-PA<br>And CH <sub>2</sub> wagging coupled with C3O1H4 bend for trans-PA |
| 10(1)         | 1080.6    | 1044.1     | 106.5   | 97.7       | 1081.5   | 1044.3     | 112.4    | 118.5      | C3O1 stretch                                                                                                                      |
| 11(1)         | 1006.0    | 989.1      | 18.4    | 17.5       | 1042.1   | 1014.9     | 4.1      | 3.3        | CH <sub>2</sub> rock coupled with C3O1H4 bend                                                                                     |
| 12(1)         | 923.3     | 912.5      | 23.8    | 24.8       | 922.5    | 912.6      | 9.7      | 8.9        | C2C3 stretch coupled with C3O1H4 bend                                                                                             |
| 13(1)         | 673.2     | 662.8      | 37.5    | 36.4       | 675.7    | 664.7      | 36.1     | 35.4       | C2≡C1-H1 bend in the C-C-O plane                                                                                                  |
| 14(1)         | 647.8     | 637.0      | 45.8    | 44.4       | 645.3    | 635.9      | 44.7     | 44.0       | C2≡C1-H1 bend perpendicular to C-C-O plane                                                                                        |
| 15(1)         | 557.9     | 549.9      | 12.5    | 9.2        | 549.8    | 551.1      | 3.1      | 1.7        | carbon chain bend parallel to C3-O1 bond, coupled with large amplitude COH motion                                                 |
| 16(1)         | 326.9     | 298.9      | 67.5    | 25.2       | 308.1    | 308.6      | 0.2      | 7.1        | carbon chain bend perpendicular to C3-O1 bond, coupled with large amplitude O-H and CH <sub>2</sub> motions                       |
| 17(1)         | 263.2     | 242.7      | 61.7    | 104.4      | 225.5    | 181.2      | 128.1    | 110.7      | carbon chain bend perpendicular to C3-O1 bond, coupled with large amplitude O-H and CH <sub>2</sub> motions                       |
| 18(1)         | 190.5     | 189.7      | 7.9     | 16.9       | 202.6    | 199.8      | 8.7      | 8.0        | carbon chain bend parallel to C3-O1 bond, coupled with large amplitude COH motion                                                 |
